# Supplementary material
Source: PubMed Central journal article supplement (PMC2596409)

**Supplemental Figure 1.** A. MCF7 cells were plated in phenol red free DMEM containing 10% charcoal dextran treated fetal bovine serum. Cells were treated with the indicated dosage of UV radiation and cell lysates collected 8 hours later. Mi-2 expression increases after UV treatment in the absence of steroid hormones similar to that seen in Figure 1C. B. The cell lines BT549 (Mammary ductal carcinoma), UL3 (U20S derivative, osteosarcoma), C33a (cervical adenocarcinoma), NHF (normal human fibroblast), Hela (cervical adenocarcinoma), HEK-293 (transformed fetal kidney) were treated with the indicated doses of UV radiation and analyzed for Mi-2 expression. The cell lines BT549, UL3, C-33a, Hela and NHF showed marked increases in MI-2 expression following UV exposure. The 293cell line showed no change in Mi-2 expression.

**Supplemental Figure 2.** Keratinocytes were mock treated with UV and then cell cycle analysis performed. Mock treatment induces a modest increase in cell cycle progression seen at 8 and 16 hours most likely caused by the addition of fresh media. However, these changes are distinct from the checkpoint initiated by UV treatment (Figure 2).

## Real Time RT-PCR Primer Sets

| <u>TARGET</u>       | <u>Primer Sequence</u>    |
|---------------------|---------------------------|
| Mi-2 $\beta$ E22 F  | TCGATGGTGGAACTCACTGGGAACA |
| Mi-2 $\beta$ E23R   | ATAACTGTGTCAGCAGTGGCCAGA  |
| Mi-2 $\alpha$ E27 F | AGGCAGCTCCGGAATGAGAAAGAT  |
| Mi-2 $\alpha$ E28 R | CAGCGCATCACAGCATTGAGGAAA  |
| MTA3 E13 F          | AATGCCACCCAGTCAGAAGAAGA   |
| MTA3 E13 R          | ACTTTGGACTCCAGTGTTTCGGA   |
| MTA2 E10 F          | AGTCACTTGCCAGCATAGTCCAGT  |
| MTA2 E11 R          | TTGCTGTCTGCTTCAGCAGCTTTC  |
| MBD2 E1 F           | AAGTGCTGGCAAGAGCGATGTCTA  |
| MBD2 E2 R           | TTTCCCAGGTACCTTGCCAACTGA  |
| MBD3 E3 F           | TCAAGCAGCCGGTGACCAAGATTA  |
| MBD3 E4 R           | TCTTGACCAGCTCCTCAGCAATGT  |
| HDAC1 E3 F          | ACATGTCCGAGTACAGCAAGCAGA  |
| HDAC1 E4/5 R        | TTGCCACAGAACCACCAGTAGACA  |
| HDAC2 E2 F          | CCGCATGACCCATAACTTGCTGTT  |
| HDAC2 E3 R          | TTTCTTCGGCAGTGGCTTTATGGG  |
| RBAP46 E8 F         | ACCGTAGCTTTATGGGATCTGCGT  |
| RBAP46 E9 R         | TTAAATCCCACACATTCAGGCGGC  |
| Cox-2 E2 F          | CAAATCCTTGCTGTTCCCACCCAT  |
| Cox-2 E2 R          | GTGCACTGTGTTTGGAGTGGGTTT  |
| GAPDH E8 F          | CCAGGTGGTCTCCTCTGACTTC    |
| GAPDH E9 R          | TCATACCAGGAAATGAGCTTGACA  |
| CYPB1 F1            | GGATAATTTTGTGGCCTTAGCTACA |
| CYPB1 R1            | CCGCCCTGGATCATGAAGT       |

# Supplemental Figure 1

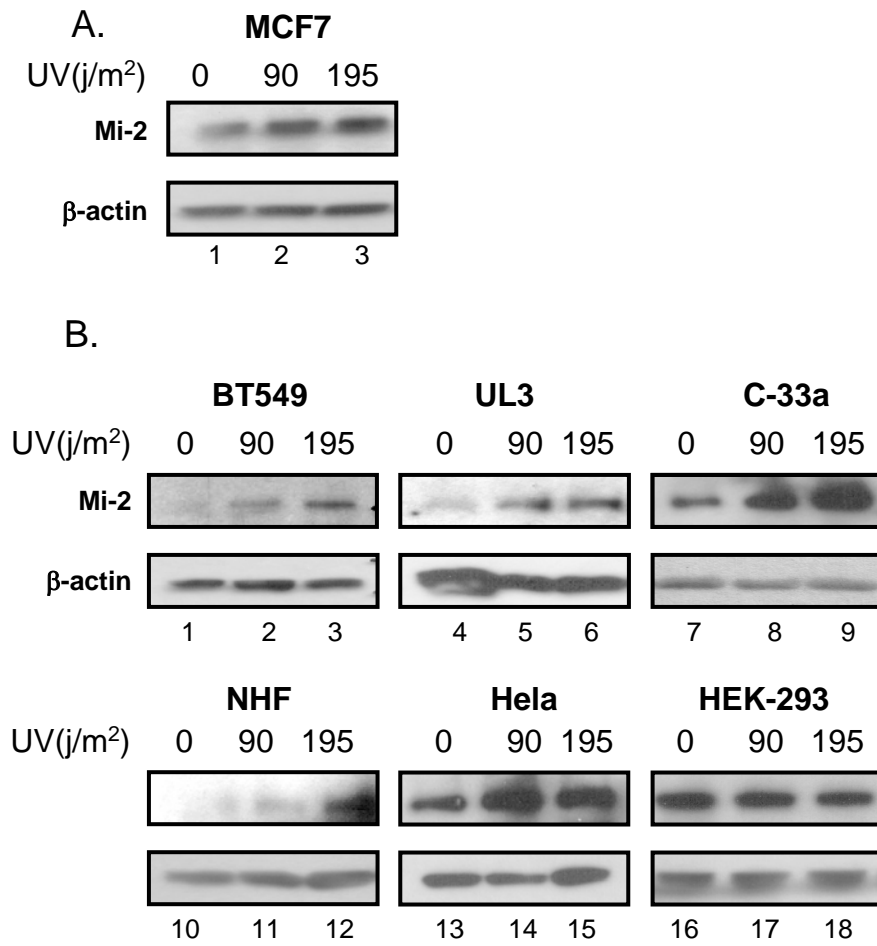

# Supplemental Figure 2

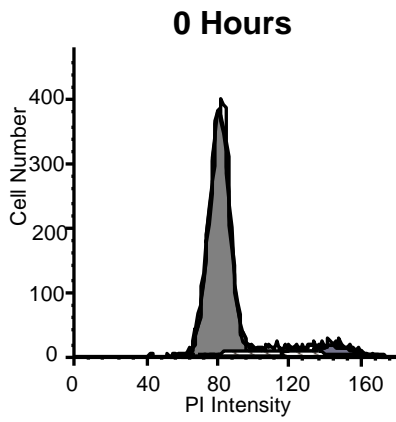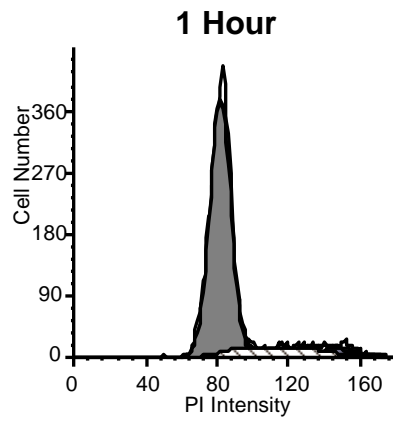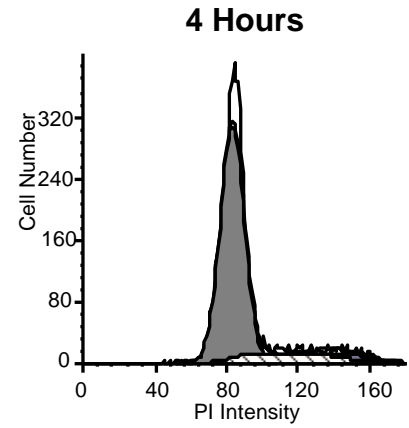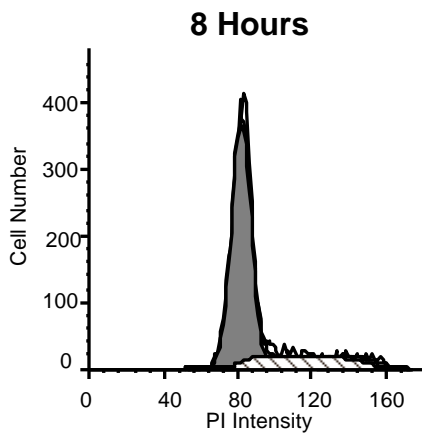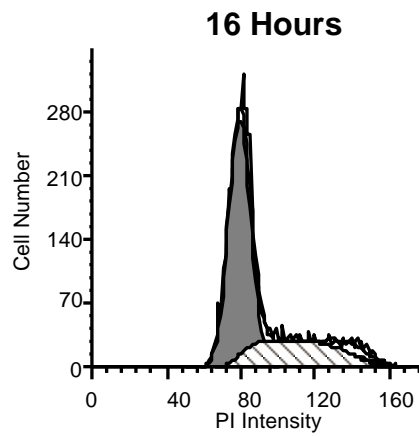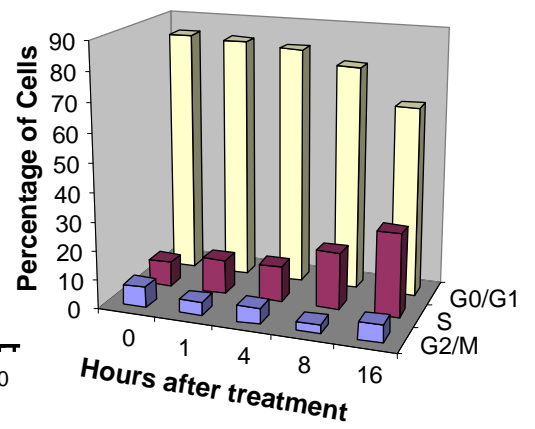

Supplement: M805383200_1.pdf [file M805383200_1.pdf]
